# Supplementary material for: Global population genomics of the forest pathogen Dothistroma septosporum reveal chromosome duplications in high dothistromin‐producing strains
Source: PubMed Central journal article supplement (PMC6637865; doi:10.1111/mpp.12791), 2019-04-01
Supplement: MPP-20-784-s001.pdf [file MPP-20-784-s001.pdf]

**Fig. S1 Predicted duplications and deletions in chromosomes 1-14 for 18 strains of *D. septosporum*.** Predictions are from sequence read copy number variations.

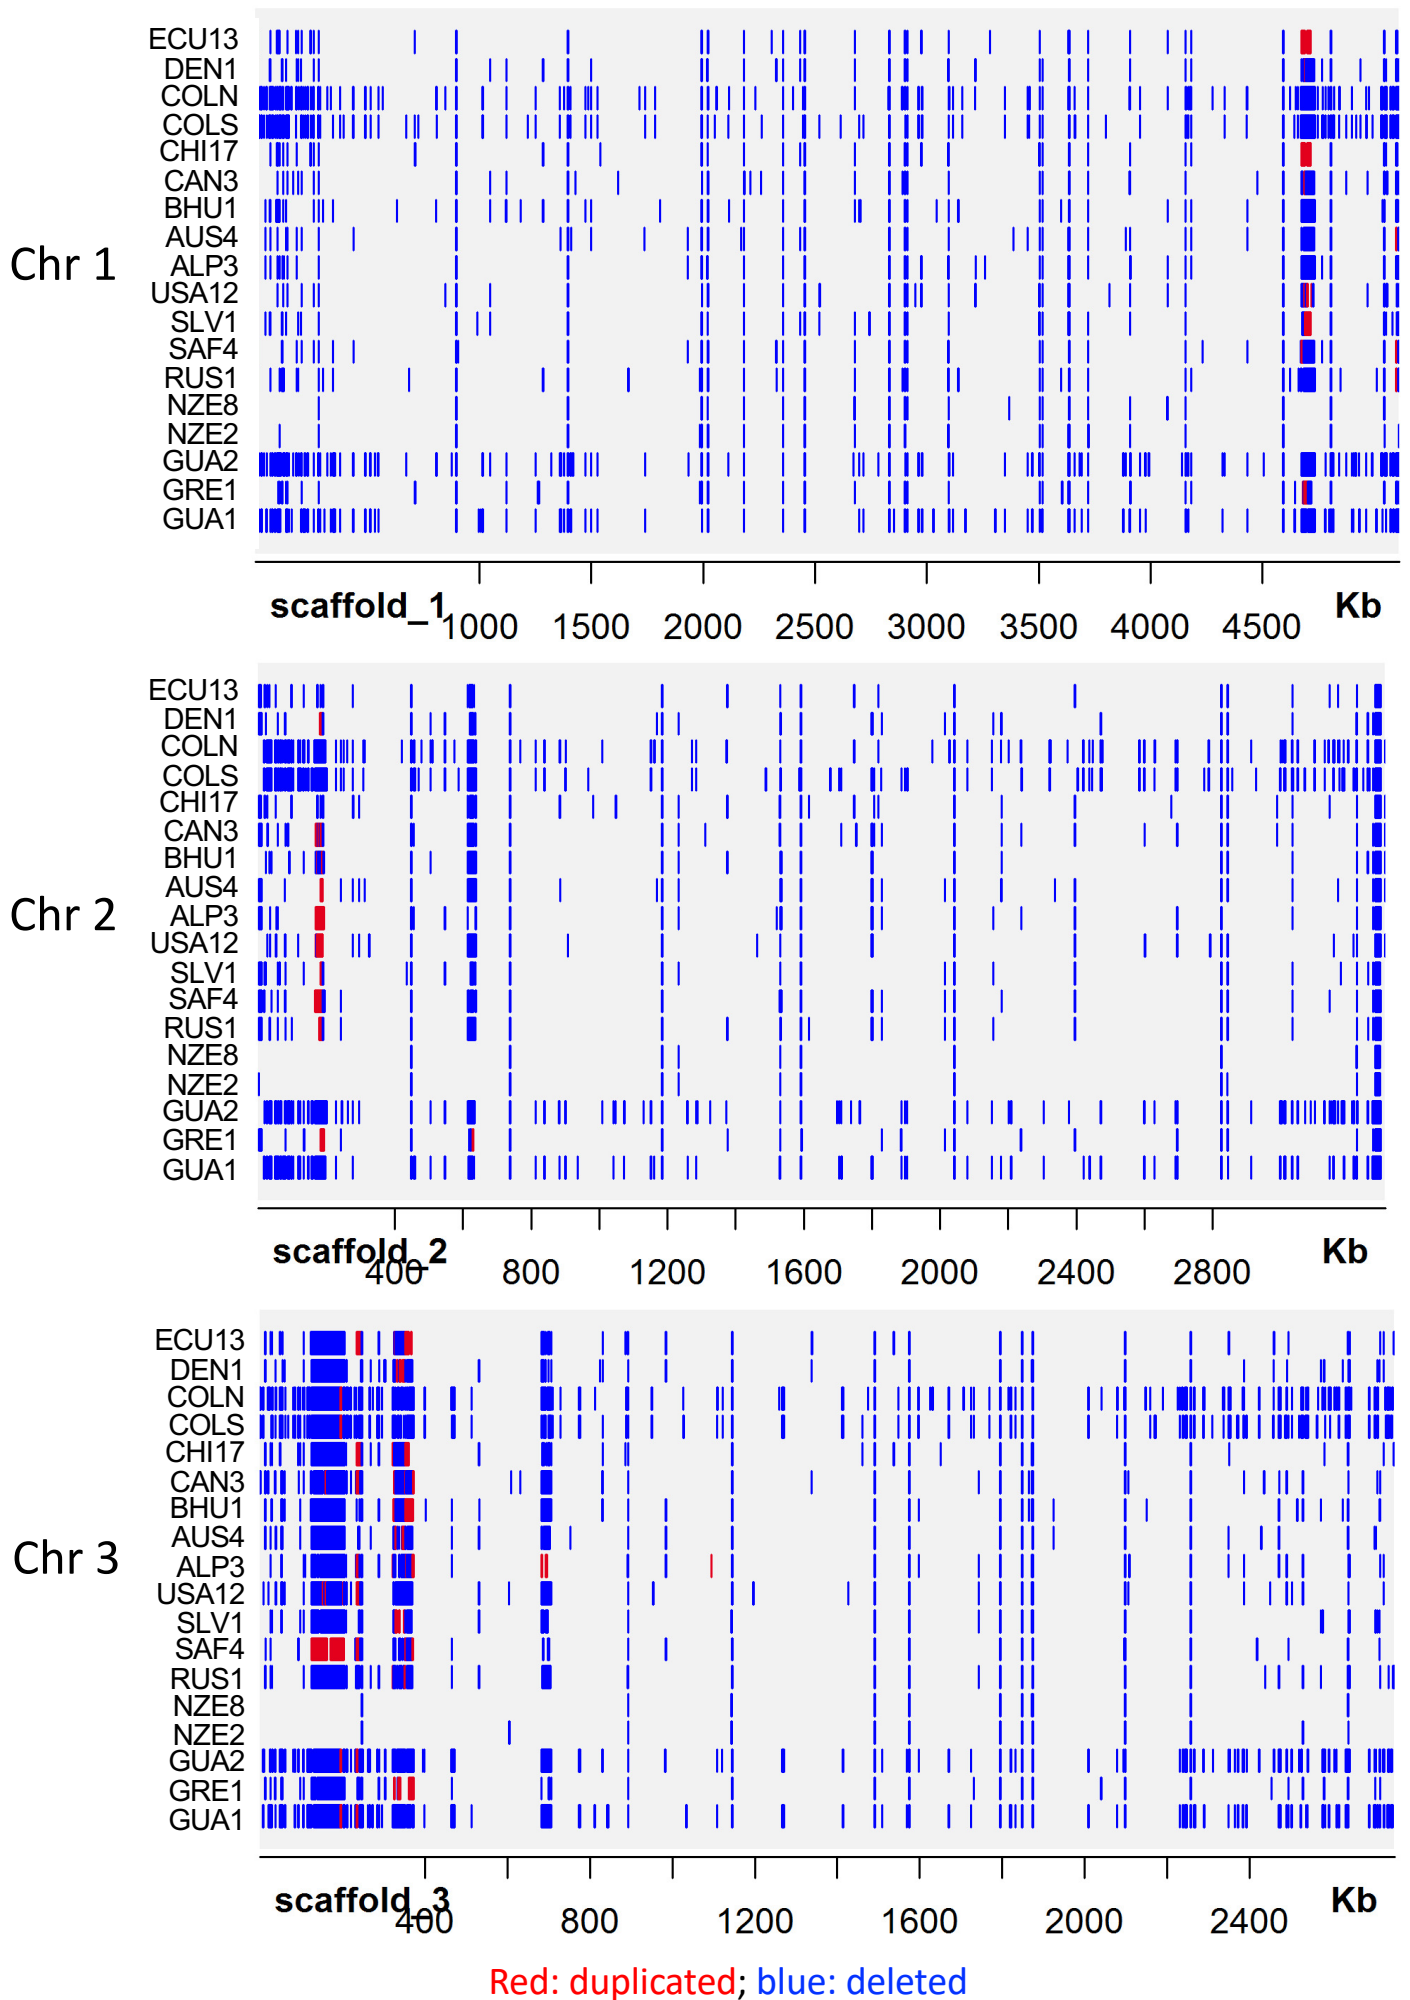

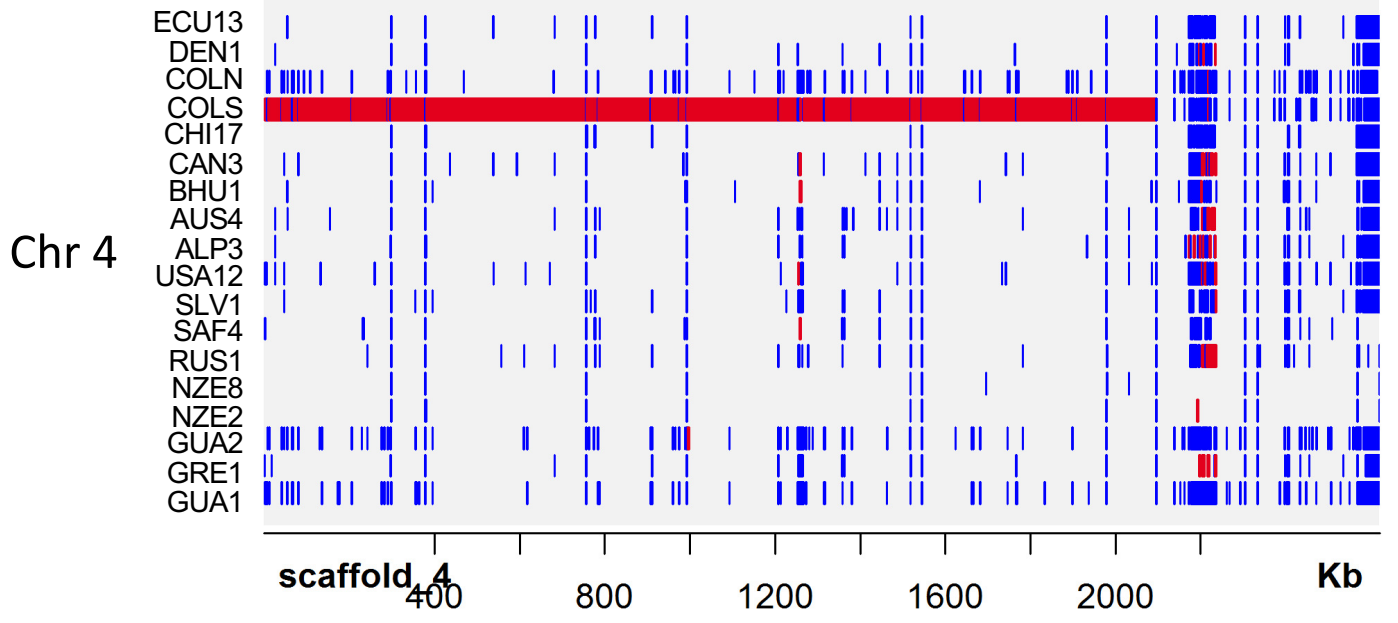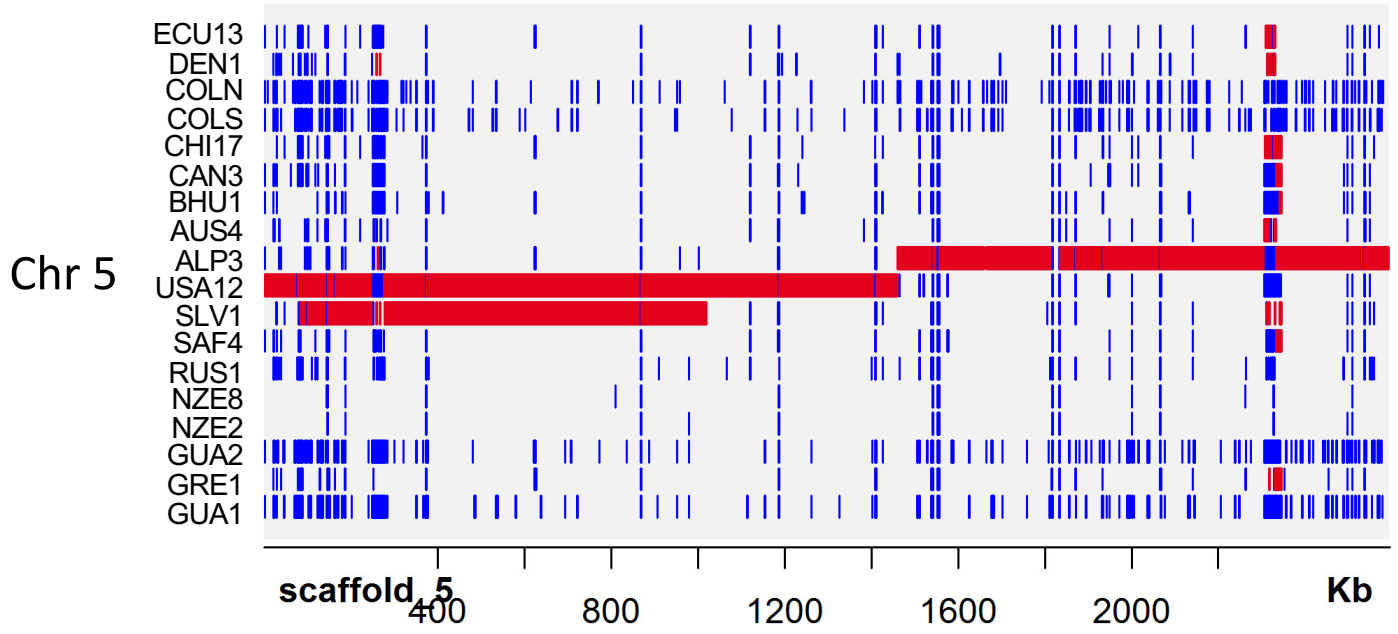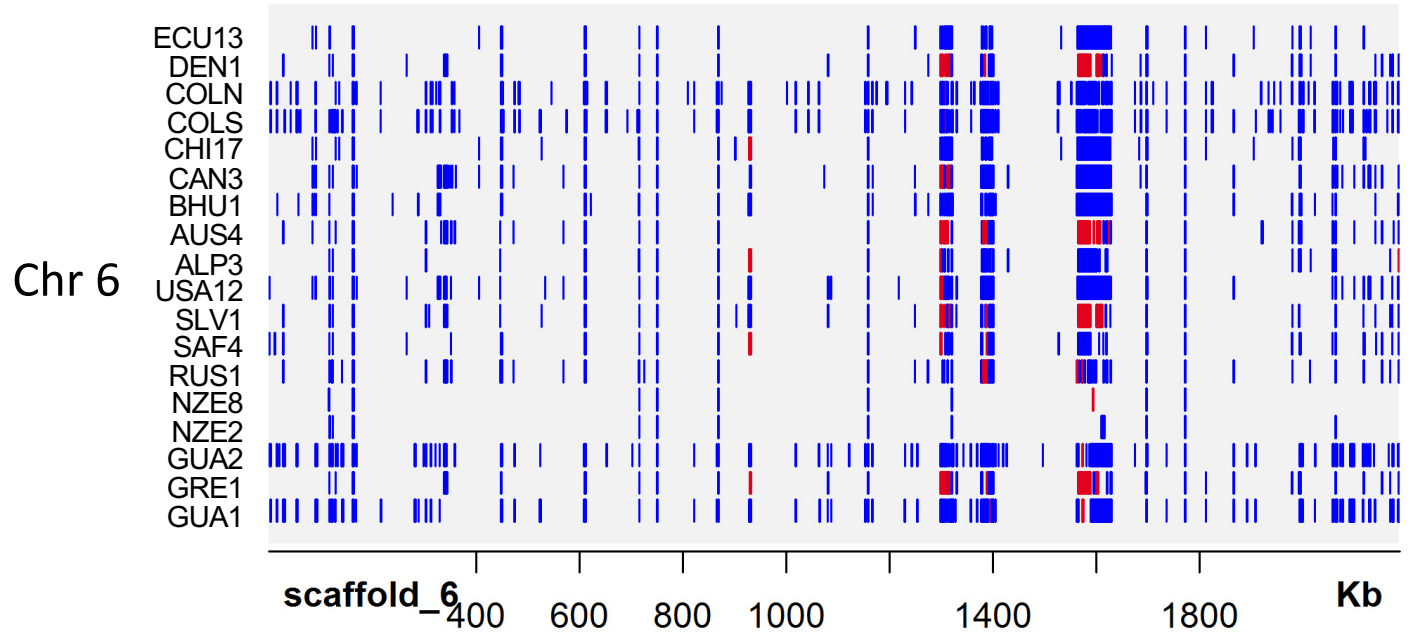

Red: duplicated; blue: deleted

Chr 7

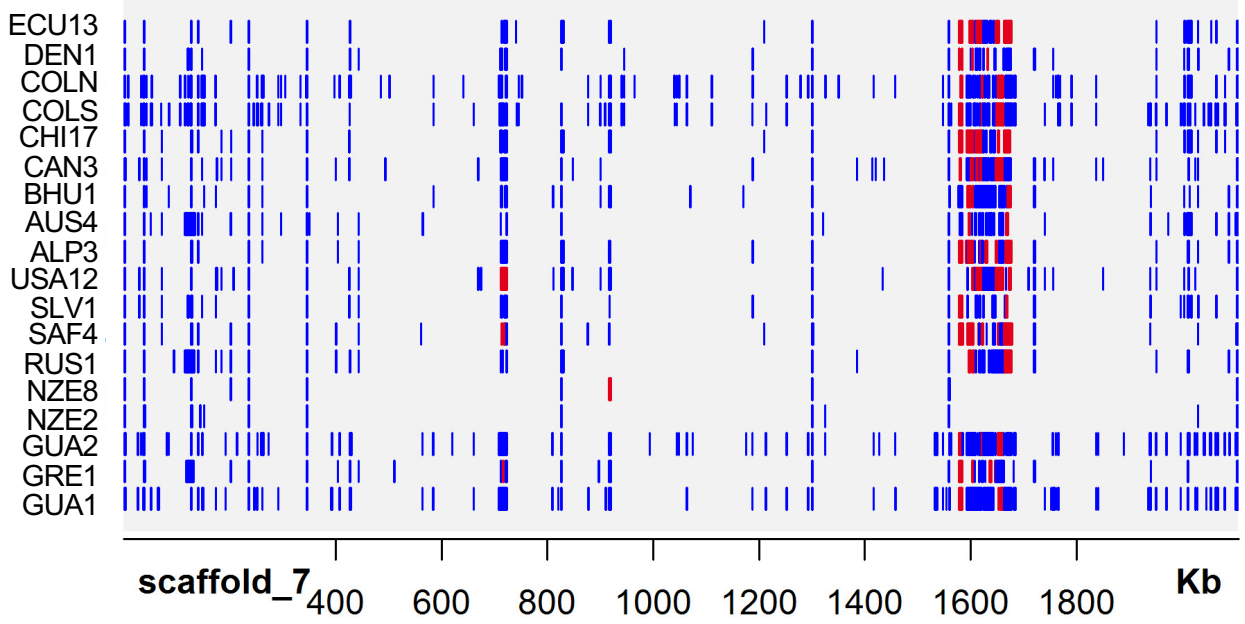

Chr 8

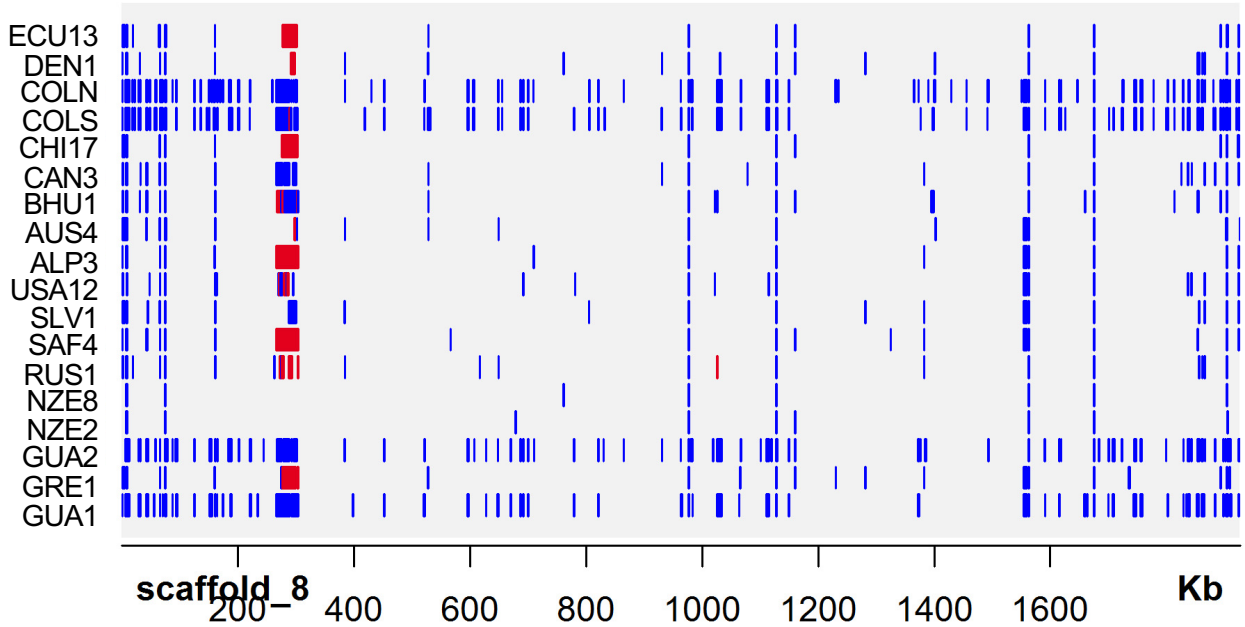

Chr 9

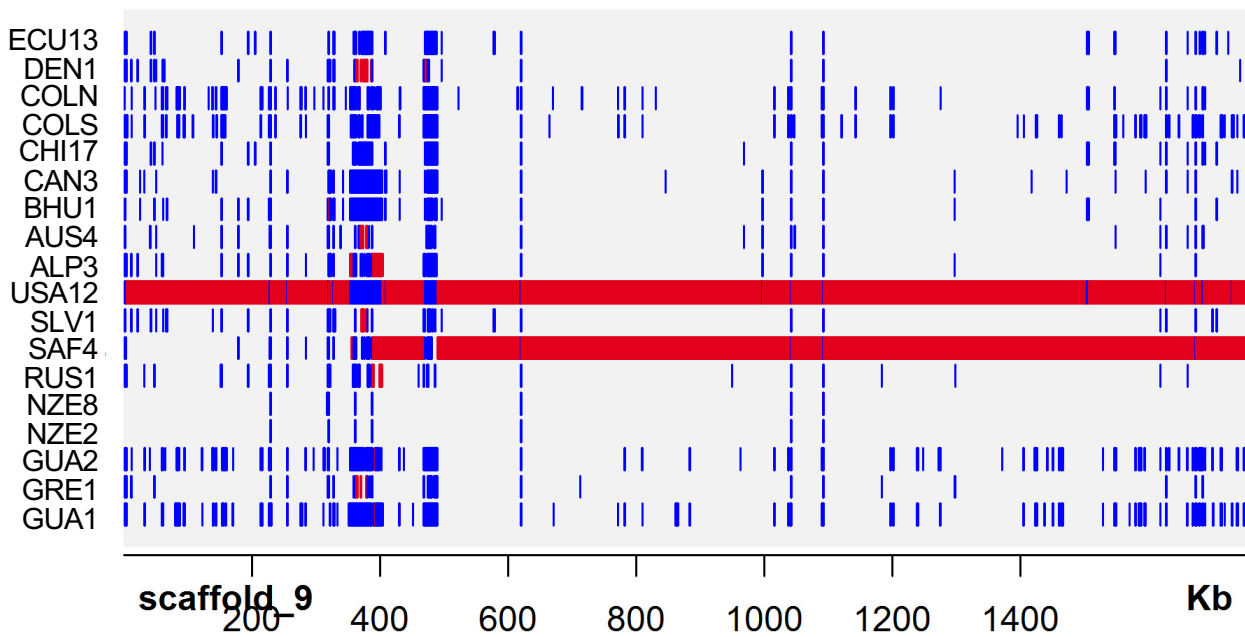

Red: duplicated; blue: deleted

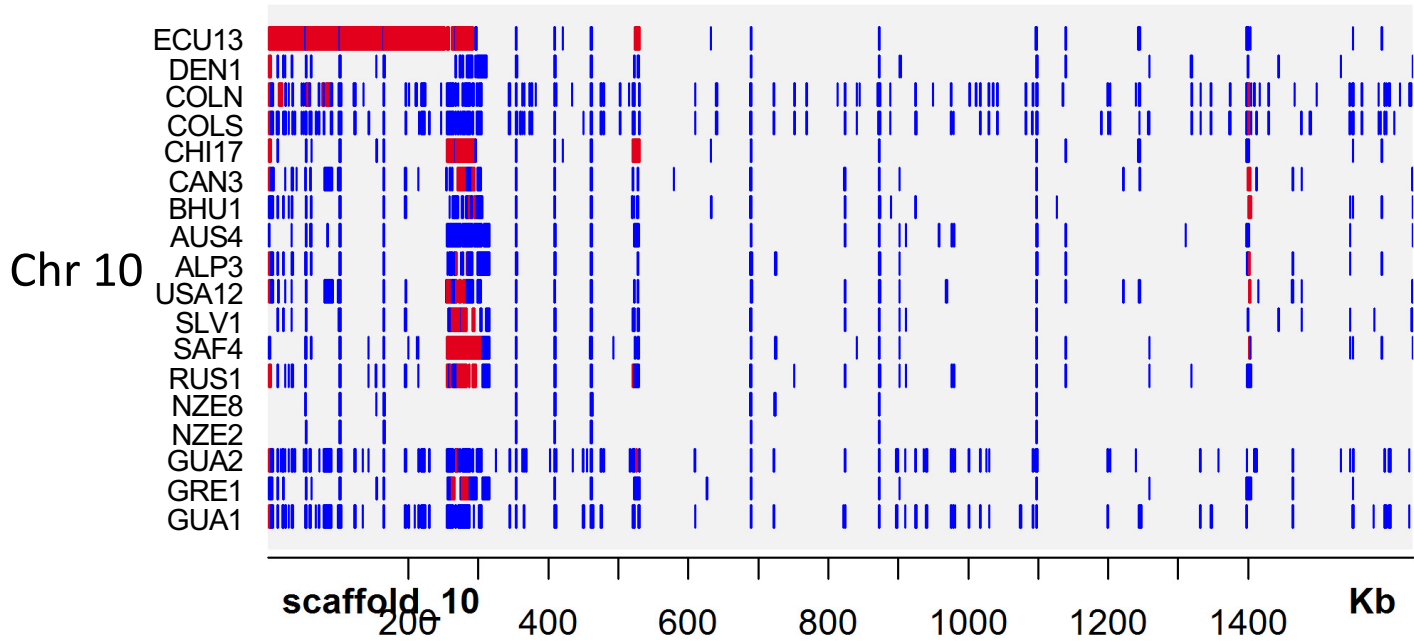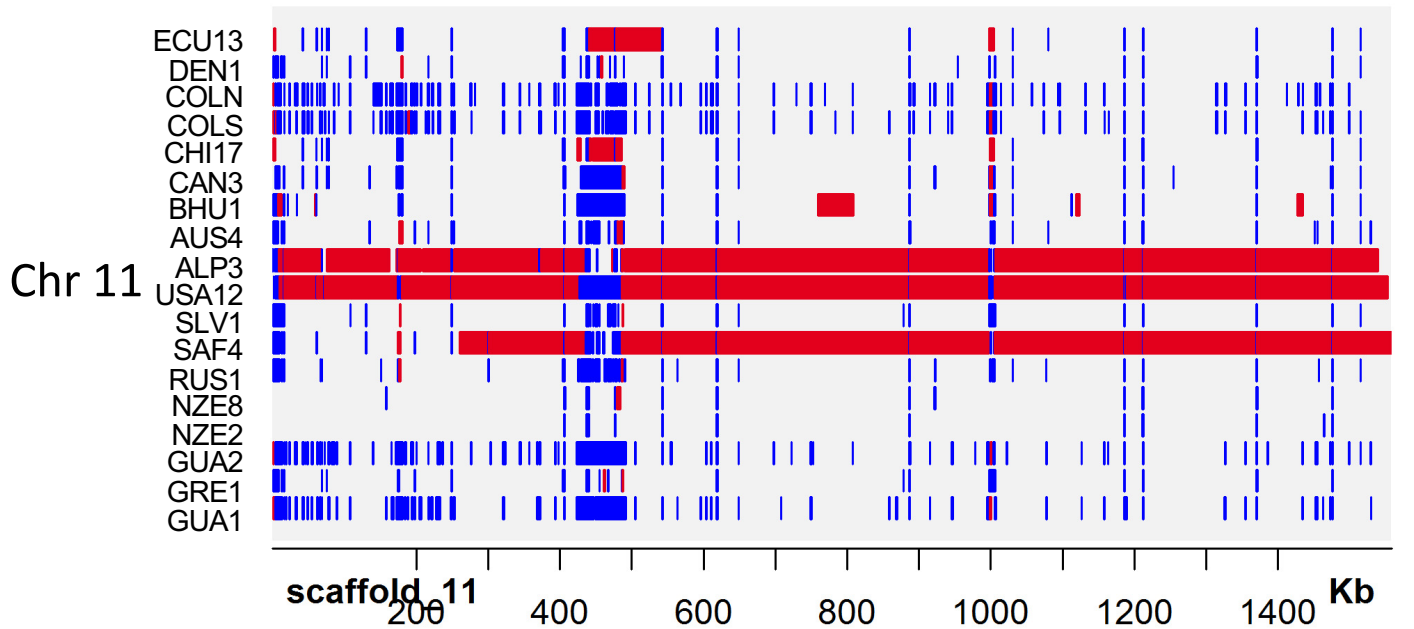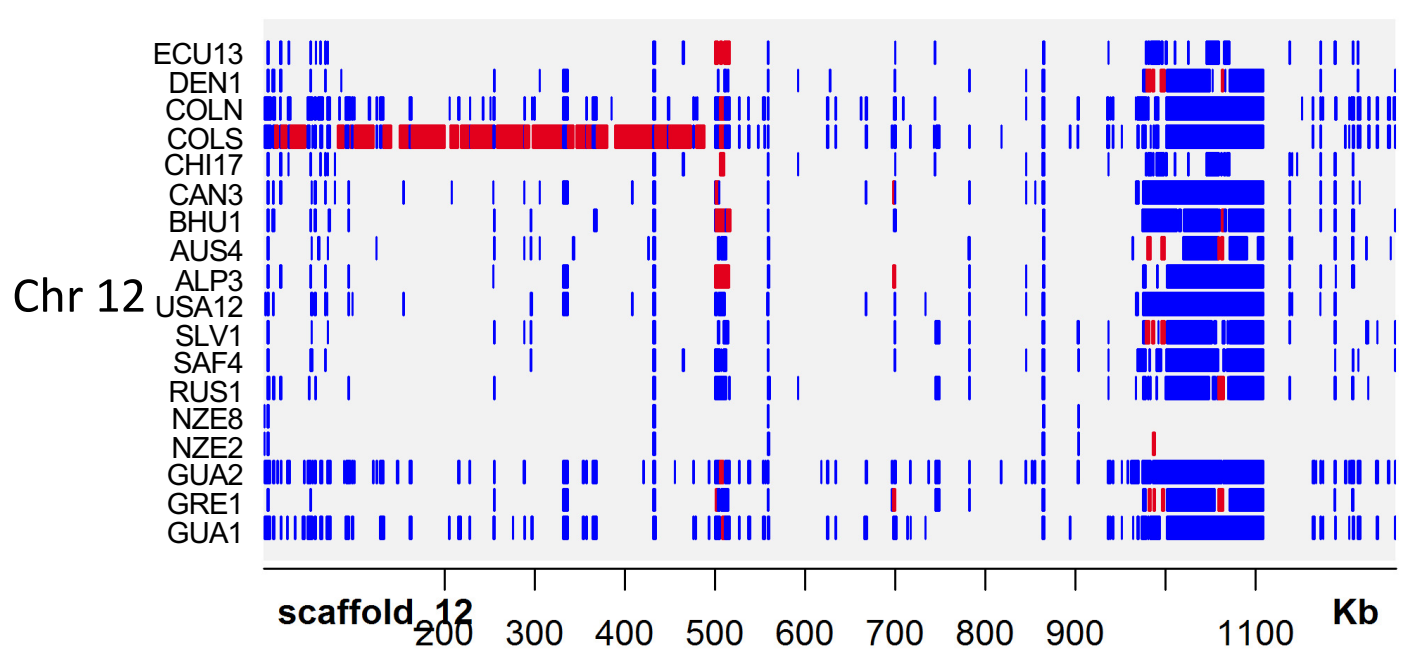

Red: duplicated; blue: deleted

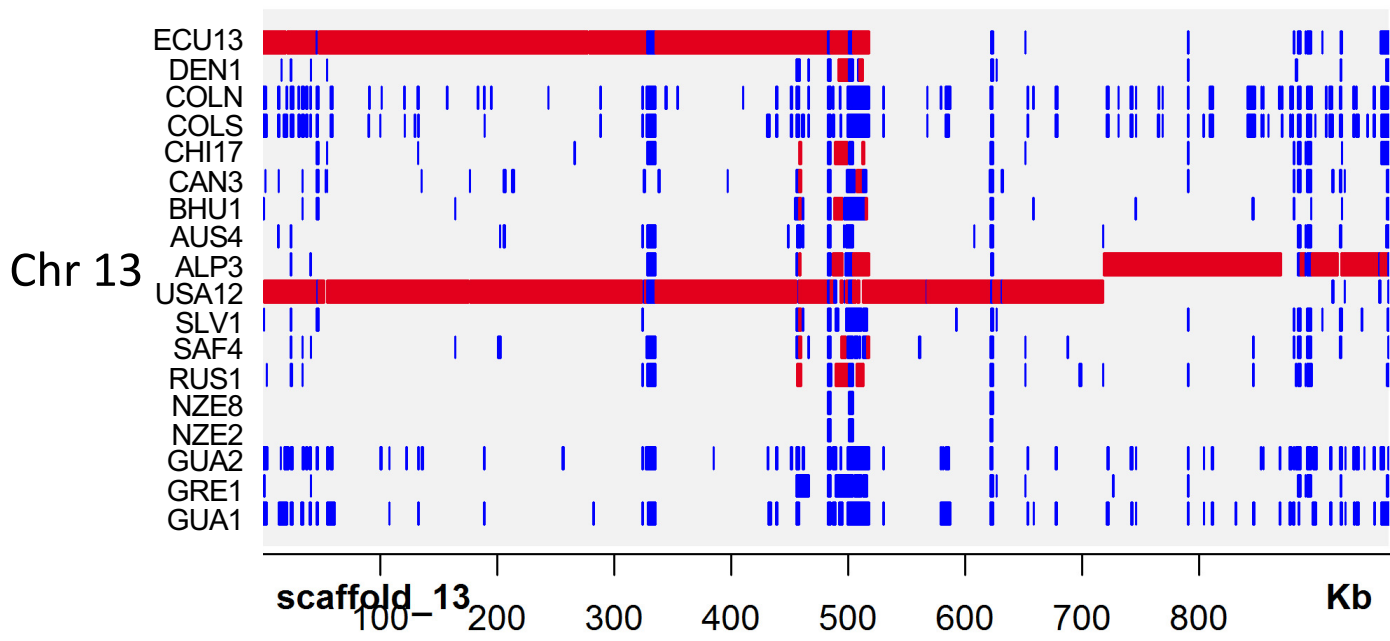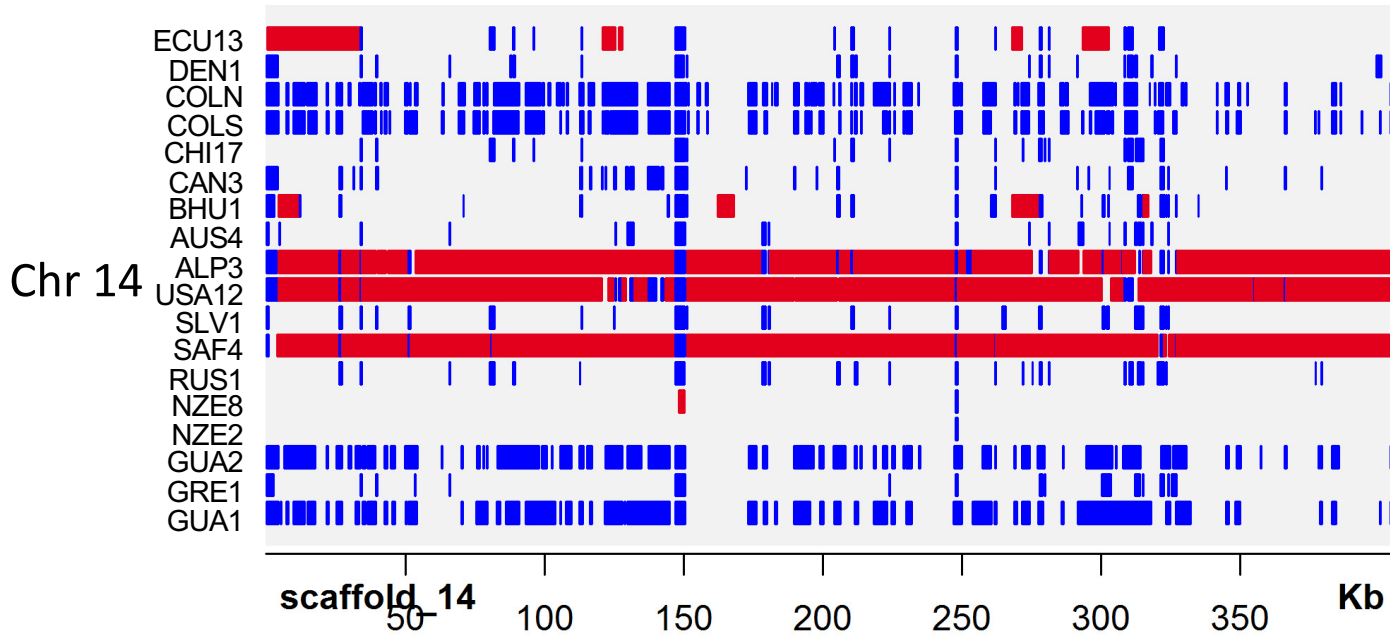

Red: duplicated; blue: deleted
