# Supplementary material for: Global population genomics of the forest pathogen Dothistroma septosporum reveal chromosome duplications in high dothistromin‐producing strains
Source: PubMed Central journal article supplement (PMC6637865; doi:10.1111/mpp.12791), 2019-04-01
Supplement: MPP-20-784-s002.pdf [file MPP-20-784-s002.pdf]

## Fig. S2

Initial evidence for a 5:13 reciprocal chromosome translocation in the NZE10 genome.

A

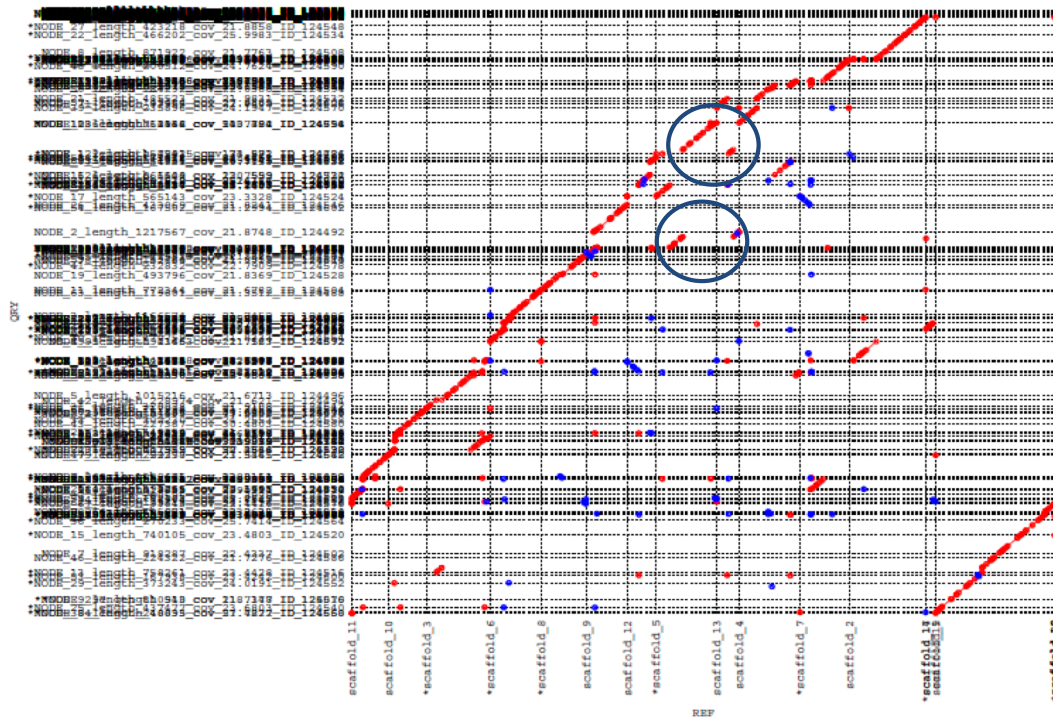

B

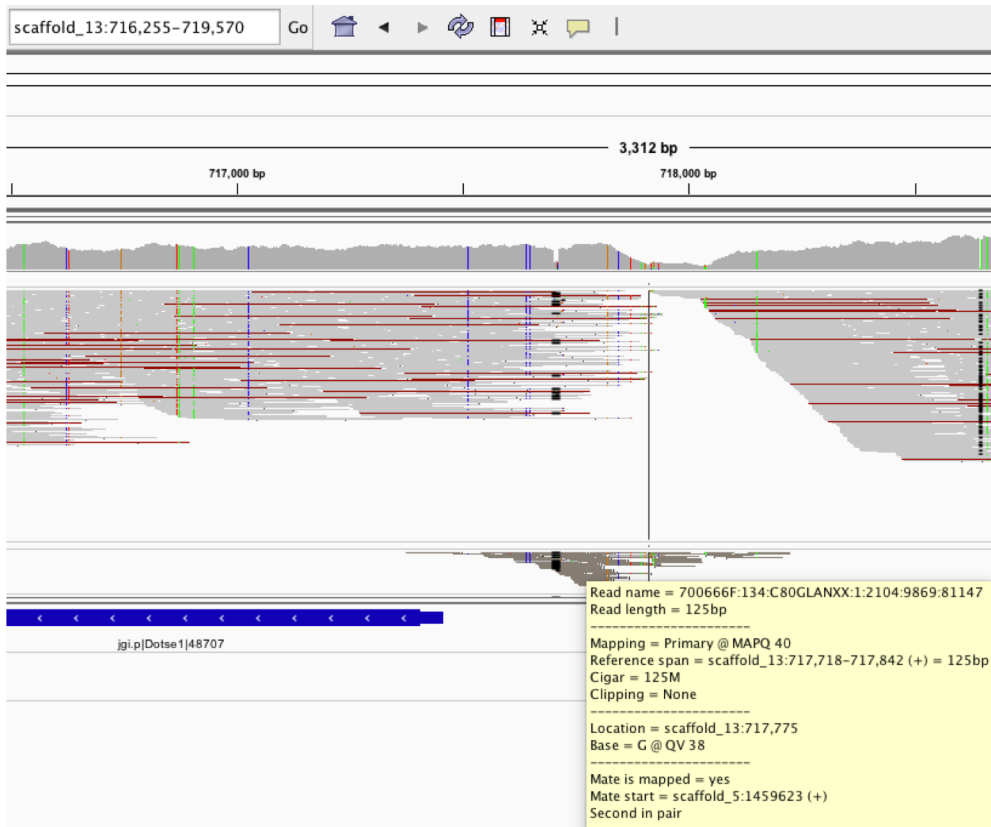

A) Assembled contigs from the SLV genome were aligned with the reference chromosomes (scaffolds). Two of the contigs (circled) mapped to both chromosomes 5 and 13 of the NZE10 reference genome. This was found in many of the other genome sequences.

B) Visualisation of reads from the ALP3 genome mapped onto a region of chromosome 13 show a gap, in which mate-pairs are mapped to chromosome 5.
