# Supplementary material for: Global population genomics of the forest pathogen Dothistroma septosporum reveal chromosome duplications in high dothistromin‐producing strains
Source: PubMed Central journal article supplement (PMC6637865; doi:10.1111/mpp.12791), 2019-04-01
Supplement: MPP-20-784-s004.pdf [file MPP-20-784-s004.pdf]

**Figure S4. Alignment of pathway regulator DsAfIR from 19 *D. septosporum* strains**

```

0_NZE10      1 MPESRGSESSGSTSRRASGTQHIATPKLKDSCTACATSKVKCSKDKPTCARCTRRGLTCDYGLSKRTGRTSHATAQK0000R00000SQQEAADRRVSQS 100
1_ALP3       1 MPESRGSESSGSTSRRASGTQHIATPKLKDSCTACATSKVKCSKDKPTCARCTRRGLTCDYGLSKRTGRTSHATAQK0000R00000SQQEAADRRVSQS 100
2_AUS4       1 MPESRGSESSGSTSRRASGTQHIATPKLKDSCTACATSKVKCSKDKPTCARCTRRGLTCDYGLSKRTGRTSHATAQK0000R00000SQQEAADRRVSQS 100
3_BHU1       1 MPESRGSESSGSTSRRASGTQHIATPKLKDSCTACATSKVKCSKDKPTCARCTRRGLTCDYGLSKRTGRTSHATAQK0000R00000SQQEAADRRVSQS 100
4_CAN3       1 MPESRGSESSGSTSRRASGTQHIATPKLKDSCTACATSKVKCSKDKPTCARCTRRGLTCDYGLSKRTGRTSHATAQK0000R00000SQQEAADRRVSQS 100
5_CHI17     1 MPESRGSESSGSTSRRASGTQHIATPKLKDSCTACATSKVKCSKDKPTCARCTRRGLTCDYGLSKRTGRTSHATAQK0000R00000SQQEAADRRVSQS 100
6_COLN       1 MPESRGSESSGSTSRRASGTQHIATPKLKDSCTACATSKVKCSKDKPTCARCTRRGLTCDYGLSKRTGRTSHATAQK0000R00000SQQEAADRRVSQS 100
7_COLS       1 MPESRGSESSGSTSRRASGTQHIATPKLKDSCTACATSKVKCSKDKPTCARCTRRGLTCDYGLSKRTGRTSHATAQK0000R00000SQQEAADRRVSQS 100
8_DEN1       1 MPESRGSESSGSTSRRASGTQHIATPKLKDSCTACATSKVKCSKDKPTCARCTRRGLTCDYGLSKRTGRTSHATAQK0000R00000SQQEAADRRVSQS 100
9_ECU13     1 MPESRGSESSGSTSRRASGTQHIATPKLKDSCTACATSKVKCSKDKPTCARCTRRGLTCDYGLSKRTGRTSHATAQK0000R00000SQQEAADRRVSQS 100
10_GUA1      1 MPESRGSESSGSTSRRASGTQHIATPKLKDSCTACATSKVKCSKDKPTCARCTRRGLTCDYGLSKRTGRTSHATAQK0000R00000SQQEAADRRVSQS 100
11_GRE1      1 MPESRGSESSGSTSRRASGTQHIATPKLKDSCTACATSKVKCSKDKPTCARCTRRGLTCDYGLSKRTGRTSHATAQK0000R00000SQQEAADRRVSQS 100
12_GUA2      1 MPESRGSESSGSTSRRASGTQHIATPKLKDSCTACATSKVKCSKDKPTCARCTRRGLTCDYGLSKRTGRTSHATAQK0000R00000SQQEAADRRVSQS 100
13_NZE2      1 MPESRGSESSGSTSRRASGTQHIATPKLKDSCTACATSKVKCSKDKPTCARCTRRGLTCDYGLSKRTGRTSHATAQK0000R00000SQQEAADRRVSQS 100
14_NZE8      1 MPESRGSESSGSTSRRASGTQHIATPKLKDSCTACATSKVKCSKDKPTCARCTRRGLTCDYGLSKRTGRTSHATAQK0000R00000SQQEAADRRVSQS 100
15_RUS1      1 MPESRGSESSGSTSRRASGTQHIATPKLKDSCTACATSKVKCSKDKPTCARCTRRGLTCDYGLSKRTGRTSHATAQK0000R00000SQQEAADRRVSQS 100
16_SAF4      1 MPESRGSESSGSTSRRASGTQHIATPKLKDSCTACATSKVKCSKDKPTCARCTRRGLTCDYGLSKRTGRTSHATAQK0000R00000SQQEAADRRVSQS 100
17_SLV1      1 MPESRGSESSGSTSRRASGTQHIATPKLKDSCTACATSKVKCSKDKPTCARCTRRGLTCDYGLSKRTGRTSHATAQK0000R00000SQQEAADRRVSQS 100
18_USA12     1 MPESRGSESSGSTSRRASGTQHIATPKLKDSCTACATSKVKCSKDKPTCARCTRRGLTCDYGLSKRTGRTSHATAQK0000R00000SQQEAADRRVSQS 100
*****

0_NZE10     101 AVPVANMLPDVDEFISPMSLQESSILSPTLMPDLSTSGSQAGLDQWNSDLWSTMFAPNEPSSNNTPANTMQTHGGNGNDIDHLFNDLTSYSMLGEPTDTA 200
1_ALP3      101 AVPVANMLPDVDEFISPMSLQESSILSPTLMPDLSTSGSQAGLDQWNSDLWSTMFAPNEPSSNNTPANTMQTHGGNGNDIDHLFNDLTSYSMLGEPTDTA 200
2_AUS4      101 AVPVANMLPDVDEFISPMSLQESSILSPTLMPDLSTSGSQAGLDQWNSDLWSTMFAPNEPSSNNTPANTMQTHGGNGNDIDHLFNDLTSYSMLGEPTDTA 200
3_BHU1      101 AVPVANMLPDVDEFISPMSLQESSILSPTLMPDLSTSGSQAGLDQWNSDLWSTMFAPNEPSSNNTPANTMQTHGGNGNDIDHLFNDLTSYSMLGEPTDTA 200
4_CAN3      101 AVPVANMLPDVDEFISPMSLQESSILSPTLMPDLSTSGSQAGLDQWNSDLWSTMFAPNEPSSNNTPANTMQTHGGNGNDIDHLFNDLTSYSMLGEPTDTA 200
5_CHI17     101 AVPVANMLPDVDEFISPMSLQESSILSPTLMPDLSTSGSQAGLDQWNSDLWSTMFAPNEPSSNNTPANTMQTHGGNGNDIDHLFNDLTSYSMLGEPTDTA 200
6_COLN      101 AVPVANMLPDVDEFISPMSLQESSILSPTLMPDLSTSGSQAGLDQWNSDLWSTMFAPNEPSSNNTPANTMQTHGGNGNDIDHLFNDLTSYSMLGEPTDTA 200
7_COLS      101 AVPVANMLPDVDEFISPMSLQESSILSPTLMPDLSTSGSQAGLDQWNSDLWSTMFAPNEPSSNNTPANTMQTHGGNGNDIDHLFNDLTSYSMLGEPTDTA 200
8_DEN1      101 AVPVANMLPDVDEFISPMSLQESSILSPTLMPDLSTSGSQAGLDQWNSDLWSTMFAPNEPSSNNTPANTMQTHGGNGNDIDHLFNDLTSYSMLGEPTDTA 200
9_ECU13     101 AVPVANMLPDVDEFISPMSLQESSILSPTLMPDLSTSGSQAGLDQWNSDLWSTMFAPNEPSSNNTPANTMQTHGGNGNDIDHLFNDLTSYSMLGEPTDTA 200
10_GUA1     101 AVPVANMLPDVDEFISPMSLQESSILSPTLMPDLSTSGSQAGLDQWNSDLWSTMFAPNEPSSNNTPANTMQTHGGNGNDIDHLFNDLTSYSMLGEPTDTA 200
11_GRE1     101 AVPVANMLPDVDEFISPMSLQESSILSPTLMPDLSTSGSQAGLDQWNSDLWSTMFAPNEPSSNNTPANTMQTHGGNGNDIDHLFNDLTSYSMLGEPTDTA 200
12_GUA2     101 AVPVANMLPDVDEFISPMSLQESSILSPTLMPDLSTSGSQAGLDQWNSDLWSTMFAPNEPSSNNTPANTMQTHGGNGNDIDHLFNDLTSYSMLGEPTDTA 200
13_NZE2     101 AVPVANMLPDVDEFISPMSLQESSILSPTLMPDLSTSGSQAGLDQWNSDLWSTMFAPNEPSSNNTPANTMQTHGGNGNDIDHLFNDLTSYSMLGEPTDTA 200
14_NZE8     101 AVPVANMLPDVDEFISPMSLQESSILSPTLMPDLSTSGSQAGLDQWNSDLWSTMFAPNEPSSNNTPANTMQTHGGNGNDIDHLFNDLTSYSMLGEPTDTA 200
15_RUS1     101 AVPVANMLPDVDEFISPMSLQESSILSPTLMPDLSTSGSQAGLDQWNSDLWSTMFAPNEPSSNNTPANTMQTHGGNGNDIDHLFNDLTSYSMLGEPTDTA 200
16_SAF4     101 AVPVANMLPDVDEFISPMSLQESSILSPTLMPDLSTSGSQAGLDQWNSDLWSTMFAPNEPSSNNTPANTMQTHGGNGNDIDHLFNDLTSYSMLGEPTDTA 200
17_SLV1     101 AVPVANMLPDVDEFISPMSLQESSILSPTLMPDLSTSGSQAGLDQWNSDLWSTMFAPNEPSSNNTPANTMQTHGGNGNDIDHLFNDLTSYSMLGEPTDTA 200
18_USA12    101 AVPVANMLPDVDEFISPMSLQESSILSPTLMPDLSTSGSQAGLDQWNSDLWSTMFAPNEPSSNNTPANTMQTHGGNGNDIDHLFNDLTSYSMLGEPTDTA 200
*****

```

0\_NZE10 201 MSNQHTHTFSDTSSSISPFDQLTSVSDMGSQDFSNIDL SMTNCTPAIQQSVEPANCLTVALGFMTQLCATASSSCTMPGSHNGNTTLPTIDSVITENRQ 300  
1\_ALP3 201 MSNQHTHTFSDTSSSISPFDQLTSVSDMGSQDFSNIDL SMANCTPAIQQSVEPANCLTVALGFMTQLCATASSSCTMPGSHNGNTTLPTIDSVITENRQ 300  
2\_AUS4 201 MSNQHTHTFSDTSSSISPFDQLTSVSDMGSQDFSNIDL SMANCTPAIQQSVEPANCLTVALGFMTQLCATASSSCTMPGSHNGNTTLPTIDSVITENRQ 300  
3\_BHU1 201 MSNQHTHTFSDTSSSISPFDQLTSVSDMGSQDFSNIDL SMANCTPAIQQSVEPANCLTVALGFMTQLCATASSSCTMPGSHNGNTTLPTIDSVITENRQ 300  
4\_CAN3 201 MSNQHTHTFSDTSSSISPFDQLTSVSDMGSQDFSNIDL SMANCTPAIQQSVEPANCLTVALGFMTQLCATASSSCTMPGSHNGNTTLPTIDSVITENRQ 300  
5\_CHI17 201 MSNQHTHTFSDTSSSISPFDQLTSVSDMGSQDFSNIDL SMANCTPAIQQSVEPANCLTVALGFMTQLCATASSSCTMPGSHNGNTTLPTIDSVITENRQ 300  
6\_COLN 201 MSNQHTHTFSDTSSSISPFDQLTSVSDMGSQDFSNIDL SMANCTPAIQQSVEPANCLTVALGFMTQLCATASSSCTMPGSHNGNTTLPTIDSVITENRQ 300  
7\_COLS 201 MSNQHTHTFSDTSSSISPFDQLTSVSDMGSQDFSNIDL SMANCTPAIQQSVEPANCLTVALGFMTQLCATASSSCTMPGSHNGNTTLPTIDSVITENRQ 300  
8\_DEN1 201 MSNQHTHTFSDTSSSISPFDQLTSVSDMGSQDFSNIDL SMANCTPAIQQSVEPANCLTVALGFMTQLCATASSSCTMPGSHNGNTTLPTIDSVITENRQ 300  
9\_ECU13 201 MSNQHTHTFSDTSSSISPFDQLTSVSDMGSQDFSNIDL SMANCTPAIQQSVEPANCLTVALGFMTQLCATASSSCTMPGSHNGNTTLPTIDSVITENRQ 300  
10\_GUA1 201 MSNQHTHTFSDTSSSISPFDQLTSVSDMGSQDFSNIDL SMANCTPAIQQSVEPANCLTVALGFMTQLCATASSSCTMPGSHNGNTTLPTIDSVITENRQ 300  
11\_GRE1 201 MSNQHTHTFSDTSSSISPFDQLTSVSDMGSQDFSNIDL SMANCTPAIQQSVEPANCLTVALGFMTQLCATASSSCTMPGSHNGNTTLPTIDSVITENRQ 300  
12\_GUA2 201 MSNQHTHTFSDTSSSISPFDQLTSVSDMGSQDFSNIDL SMANCTPAIQQSVEPANCLTVALGFMTQLCATASSSCTMPGSHNGNTTLPTIDSVITENRQ 300  
13\_NZE2 201 MSNQHTHTFSDTSSSISPFDQLTSVSDMGSQDFSNIDL SMTNCTPAIQQSVEPANCLTVALGFMTQLCATASSSCTMPGSHNGNTTLPTIDSVITENRQ 300  
14\_NZE8 201 MSNQHTHTFSDTSSSISPFDQLTSVSDMGSQDFSNIDL SMTNCTPAIQQSVEPANCLTVALGFMTQLCATASSSCTMPGSHNGNTTLPTIDSVITENRQ 300  
15\_RUS1 201 MSNQHTHTFSDTSSSISPFDQLTSVSDMGSQDFSNIDL SMANCTPAIQQSVEPANCLTVALGFMTQLCATASSSCTMPGSHNGNTTLPTIDSVITENRQ 300  
16\_SAF4 201 MSNQHTHTFSDTSSSISPFDQLTSVSDMGSQDFSNIDL SMANCTPAIQQSVEPANCLTVALGFMTQLCATASSSCTMPGSHNGNTTLPTIDSVITENRQ 300  
17\_SLV1 201 MSNQHTHTFSDTSSSISPFDQLTSVSDMGSQDFSNIDL SMANCTPAIQQSVEPANCLTVALGFMTQLCATASSSCTMPGSHNGNTTLPTIDSVITENRQ 300  
18\_USA12 201 MSNQHTHTFSDTSSSISPFDQLTSVSDMGSQDFSNIDL SMANCTPAIQQSVEPANCLTVALGFMTQLCATASSSCTMPGSHNGNTTLPTIDSVITENRQ 300  
\*\*\*\*\*v\*\*\*\*\*

0\_NZE10 301 IVDQIVKILECPCSHDEYLLTIVHLVVFVMAWYAAAAREKPSLAEEINWTDQQSGRPRSRTHSEEVLRFPPSIDGYSSDGDNGRMAAQLVLSSELHRVQ 400  
1\_ALP3 301 IVDQIVKILECPCSHDEYLLTIVHLVVFVMAWYAAAAREKPSLAEEINWTDQQSGRPRSRTHSEEVLRFPPSIDGYSSDGDNGRMAAQLVLSSELHRVQ 400  
2\_AUS4 301 IVDQIVKILECPCSHDEYLLTIVHLVVFVMAWYAAAAREKPSLAEEINWTDQQSGRPRSRTHSEEVLRFPPSIDGYSSDGDNGRMAAQLVLSSELHRVQ 400  
3\_BHU1 301 IVDQIVKILECPCSHDEYLLTIVHLVVFVMAWYAAAAREKPSLAEEINWTDQQSGRPRSRTHSEEVLRFPPSIDGYSSDGDNGRMAAQLVLSSELHRVQ 400  
4\_CAN3 301 IVDQIVKILECPCSHDEYLLTIVHLVVFVMAWYAAAAREKPSLAEEINWTDQQSGRPRSRTHSEEVLRFPPSIDGYSSDGDNGRMAAQLVLSSELHRVQ 400  
5\_CHI17 301 IVDQIVKILECPCSHDEYLLTIVHLVVFVMAWYAAAAREKPSLAEEINWTDQQSGRPRSRTHSEEVLRFPPSIDGYSSDGDNGRMAAQLVLSSELHRVQ 400  
6\_COLN 301 IVDQIVKILECPCSHDEYLLTIVHLVVFVMAWYAAAAREKPSLAEEINWTDQQSDRPRSRTHSEEVLRFPPSIDGYSSDGDNGRMAAQLVLSSELHRVQ 400  
7\_COLS 301 IVDQIVKILECPCSHDEYLLTIVHLVVFVMAWYAAAAREKPSLAEEINWTDQQSDRPRSRTHSEEVLRFPPSIDGYSSDGDNGRMAAQLVLSSELHRVQ 400  
8\_DEN1 301 IVDQIVKILECPCSHDEYLLTIVHLVVFVMAWYAAAAREKPSLAEEINWTDQQSGRPRSRTHSEEVLRFPPSIDGYSSDGDNGRMAAQLVLSSELHRVQ 400  
9\_ECU13 301 IVDQIVKILECPCSHDEYLLTIVHLVVFVMAWYAAAAREKPSLAEEINWTDQQSGRPRSRTHSEEVLRFPPSIDGYSSDGDNGRMAAQLVLSSELHRVQ 400  
10\_GUA1 301 IVDQIVKILECPCSHDEYLLTIVHLVVFVMAWYAAAAREKPSLAEEINWTDQQSDRPRSRTHSEEVLRFPPSIDGYSSDGDNGRMAAQLVLSSELHRVQ 400  
11\_GRE1 301 IVDQIVKILECPCSHDEYLLTIVHLVVFVMAWYAAAAREKPSLAEEINWTDQQSGRPRSRTHSEEVLRFPPSIDGYSSDGDNGRMAAQLVLSSELHRVQ 400  
12\_GUA2 301 IVDQIVKILECPCSHDEYLLTIVHLVVFVMAWYAAAAREKPSLAEEINWTDQQSDRPRSRTHSEEVLRFPPSIDGYSSDGDNGRMAAQLVLSSELHRVQ 400  
13\_NZE2 301 IVDQIVKILECPCSHDEYLLTIVHLVVFVMAWYAAAAREKPSLAEEINWTDQQSGRPRSRTHSEEVLRFPPSIDGYSSDGDNGRMAAQLVLSSELHRVQ 400  
14\_NZE8 301 IVDQIVKILECPCSHDEYLLTIVHLVVFVMAWYAAAAREKPSLAEEINWTDQQSGRPRSRTHSEEVLRFPPSIDGYSSDGDNGRMAAQLVLSSELHRVQ 400  
15\_RUS1 301 IVDQIVKILECPCSHDEYLLTIVHLVVFVMAWYAAAAREKPSLAEEINWTDQQSGRPRSRTHSEEVLRFPPSIDGYSSDGDNGRMAAQLVLSSELHRVQ 400  
16\_SAF4 301 IVDQIVKILECPCSHDEYLLTIVHLVVFVMAWYAAAAREKPSLAEEINWTDQQSGRPRSRTHSEEVLRFPPSIDGYSSDGDNGRMAAQLVLSSELHRVQ 400  
17\_SLV1 301 IVDQIVKILECPCSHDEYLLTIVHLVVFVMAWYAAAAREKPSLAEEINWTDQQSGRPRSRTHSEEVLRFPPSIDGYSSDGDNGRMAAQLVLSSELHRVQ 400  
18\_USA12 301 IVDQIVKILECPCSHDEYLLTIVHLVVFVMAWYAAAAREKPSLAEEINWTDQQSGRPRSRTHSEEVLRFPPSIDGYSSDGDNGRMAAQLVLSSELHRVQ 400  
\*\*\*\*\*c\*\*\*\*\*v\*\*\*\*\*

|          |     |                                                                                  |     |
|----------|-----|----------------------------------------------------------------------------------|-----|
| 0_NZE10  | 401 | RLVNLLSQRLEGVRLRNHVASSGSSSSSLESIGEDSVVGVSLSATAGSPLSSPTFDQLEADLRKRLRAVSFETIDVLRRS | 479 |
| 1_ALP3   | 401 | RLVNLLSQRLEGVRLRNHVASSGSSSSSLESIGEDSVVGVSLSATAGSPLSSPTFDQLEADLRKRLRAVSFETIDVLRRS | 479 |
| 2_AUS4   | 401 | RLVNLLSQRLEGVRLRNHVASSGSSSSSLESIGEDSVVGVSLSATAGSPLSSPTFDQLEADLRKRLRAVSFETIDVLRRS | 479 |
| 3_BHU1   | 401 | RLVNLLSQRLEGVRLRNHVASSGSSSSSLESIGEDSVVGVSLSATAGSPLSSPTFDQLEADLRKRLRAVSFETIDVLRRS | 479 |
| 4_CAN3   | 401 | RLVNLLSQRLEGVRLRNHVASSGSSSSSLESIGEDSVVGVSLSATAGSPLSSPTFDQLEADLRKRLRAVSFETIDVLRRS | 479 |
| 5_CHI17  | 401 | RLVNLLSQRLEGVRLRNHVASSGSSSSSLESIGEDSVVGVSLSATAGSPLSSPTFDQLEADLRKRLRAVSFETIDVLRRS | 479 |
| 6_COLN   | 401 | RLVNLLSQRLEGVRLRNHVASSGSSSSSLESIGEDSVVGVSLSATAGSPLSSPTFDQLEADLRKRLRAVSFETIDVLRRS | 479 |
| 7_COLS   | 401 | RLVNLLSQRLEGVRLRNHVASSGSSSSSLESIGEDSVVGVSLSATAGSPLSSPTFDQLEADLRKRLRAVSFETIDVLRRS | 479 |
| 8_DEN1   | 401 | RLVNLLSQRLEGVRLRNHVASSGSSSSSLESIGEDSVVGVSLSATAGSPLSSPTFDQLEADLRKRLRAVSFETIDVLRRS | 479 |
| 9_ECU13  | 401 | RLVNLLSQRLEGVRLRNHVASSGSSSSSLESIGEDSVVGVSLSATAGSPLSSPTFDQLEADLRKRLRAVSFETIDVLRRS | 479 |
| 10_GUA1  | 401 | RLVNLLSQRLEGVRLRNHVASSGSSSSSLESIGEDSVVGVSLSATAGSPLSSPTFDQLEADLRKRLRAVSFETIDVLRRS | 479 |
| 11_GRE1  | 401 | RLVNLLSQRLEGVRLRNHVASSGSSSSSLESIGEDSVVGVSLSATAGSPLSSPTFDQLEADLRKRLRAVSFETIDVLRRS | 479 |
| 12_GUA2  | 401 | RLVNLLSQRLEGVRLRNHVASSGSSSSSLESIGEDSVVGVSLSATAGSPLSSPTFDQLEADLRKRLRAVSFETIDVLRRS | 479 |
| 13_NZE2  | 401 | RLVNLLSQRLEGVRLRNHVASSGSSSSSLESIGEDSVVGVSLSATAGSPLSSPTFDQLEADLRKRLRAVSFETIDVLRRS | 479 |
| 14_NZE8  | 401 | RLVNLLSQRLEGVRLRNHVASSGSSSSSLESIGEDSVVGVSLSATAGSPLSSPTFDQLEADLRKRLRAVSFETIDVLRRS | 479 |
| 15_RUS1  | 401 | RLVNLLSQRLEGVRLRNHVASSGSSSSSLESIGEDSVVGVSLSATAGSPLSSPTFDQLEADLRKRLRAVSFETIDVLRRS | 479 |
| 16_SAF4  | 401 | RLVNLLSQRLEGVRLRNHVASSGSSSSSLESIGEDSVVGVSLSATAGSPLSSPTFDQLEADLRKRLRAVSFETIDVLRRS | 479 |
| 17_SLV1  | 401 | RLVNLLSQRLEGVRLRNHVASSGSSSSSLESIGEDSVVGVSLSATAGSPLSSPTFDQLEADLRKRLRAVSFETIDVLRRS | 479 |
| 18_USA12 | 401 | RLVNLLSQRLEGVRLRNHVASSGSSSSSLESIGEDSVVGVSLSATAGSPLSSPTFDQLEADLRKRLRAVSFETIDVLRRS | 479 |

\*\*\*\*\*

**Figure S4. Alignment of pathway regulator DsAflR from 19 *D. septosporum* strains.**

Amino acid changes compared to strain NZE10 are highlighted in blue (these sites also variant between AflR sequences of *D. septosporum*, *C. fulvum*, *Aspergillus parasiticus* and *A. nidulans*; (Chettri et al., 2013)) or in green (at sites conserved between those four species). The Zn<sub>2</sub>Cys<sub>6</sub> zinc binuclear domain is highlighted in pink; the linker sequence thought to determine DNA-binding specificity in grey; the acidic glutamine-rich motif in yellow and C-terminal arginine residues implicated in AflJ binding in red.
