# Supplementary material for: Global population genomics of the forest pathogen Dothistroma septosporum reveal chromosome duplications in high dothistromin‐producing strains
Source: PubMed Central journal article supplement (PMC6637865; doi:10.1111/mpp.12791), 2019-04-01
Supplement: MPP-20-784-s005.pdf [file MPP-20-784-s005.pdf]

**Fig. S5 Secondary structure predictions for AfIR from *D. septosporum* NZE10 and ALP3.** Pairwise alignment predicted by HHpred. The arrow indicates the location of the N349K polymorphism in ALP3.

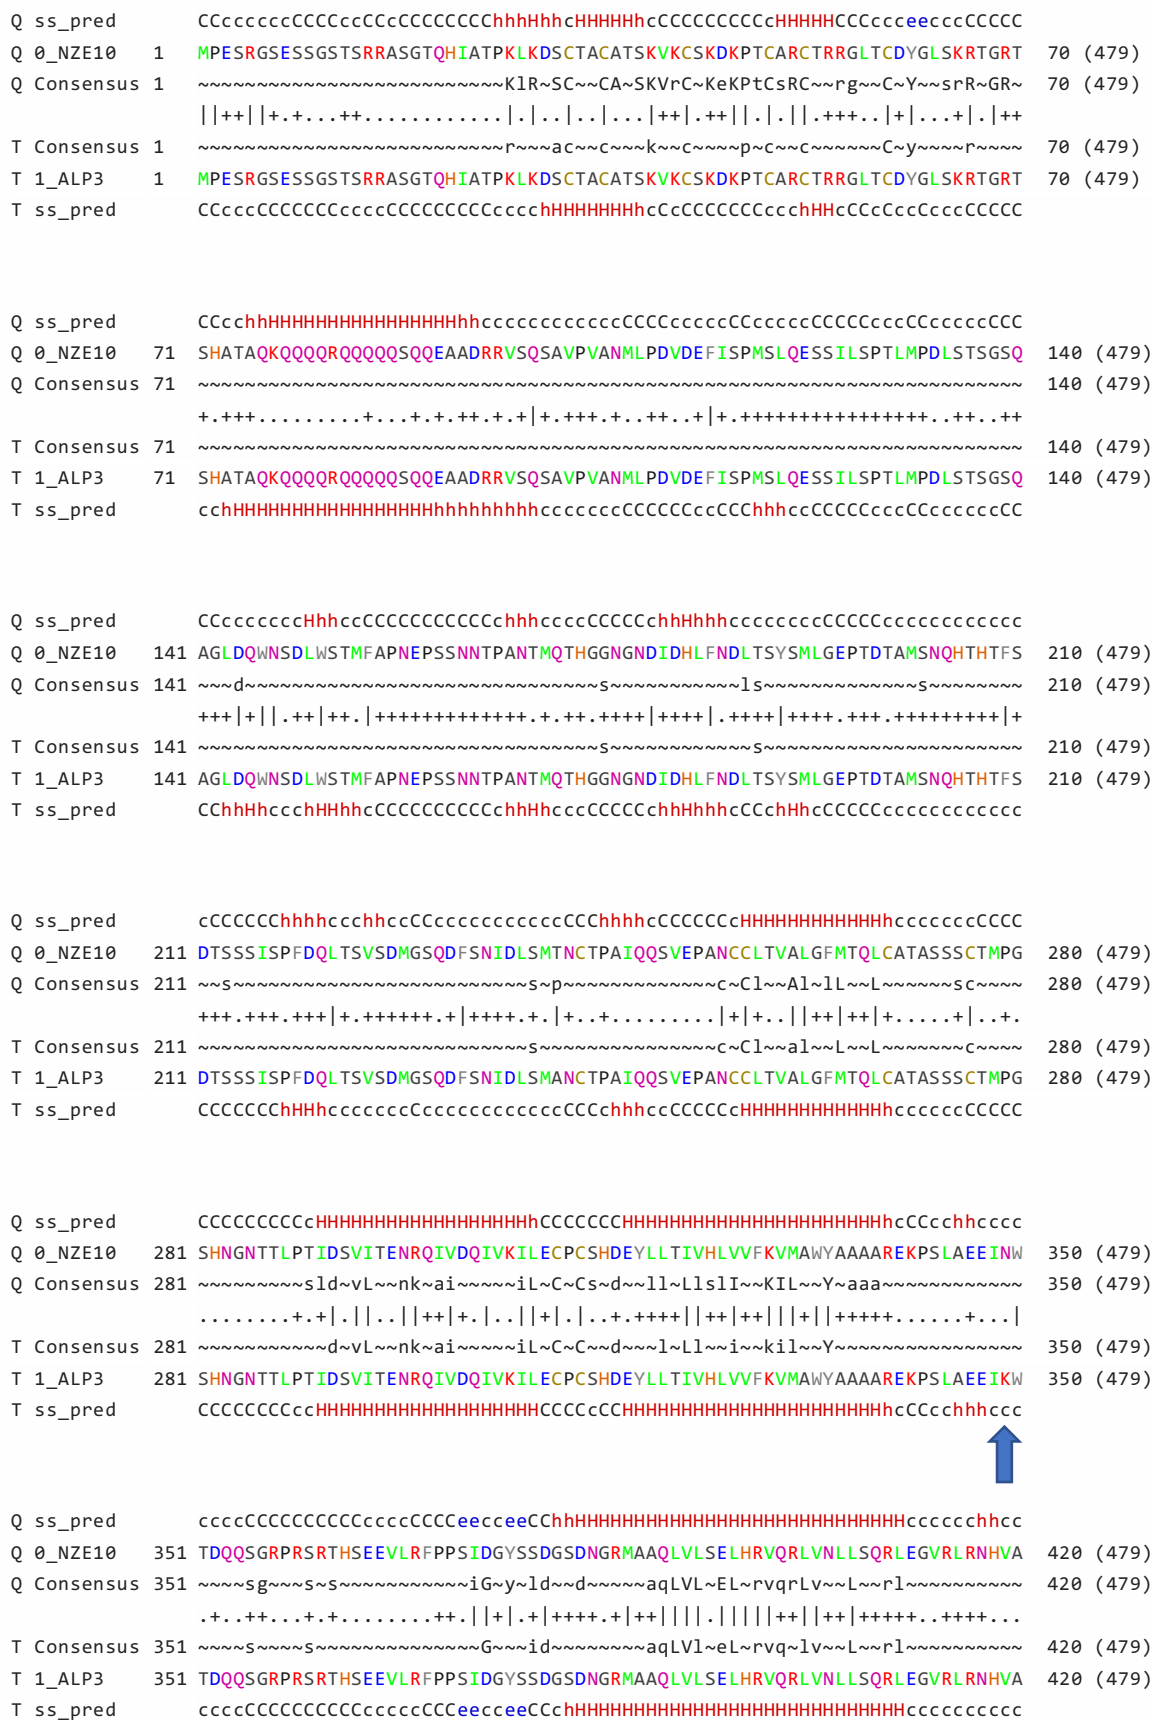

```

Q ss_pred          ccCcccccccCCCCccccCcccCCCCCCHHHHHHHHHHHHHHHHHHHHHHHHHHHHHHHhC
Q 0_NZE10         421 SSGSSSSLESTIGEDSVVGVSLSATAGSPLSSPTFDQLEADLRKRLRAVSFETIDVLRRS 479 (479)
Q Consensus       421 ~~~~~p~s~~l~qle~dLR~rL~rL~s~i~i~Lr~ 479 (479)
                   ..+..+..++|++...+...+...+...|||..+|+|||.|||||+|||.|||++|||+
T Consensus       421 ~~~~~p~s~~l~qle~dLr~rL~rL~s~i~i~Lr~ 479 (479)
T 1_ALP3          421 SSGSSSSLESTIGEDSVVGVSLSATAGSPLSSPTFDQLEADLRKRLRAVSFETIDVLRRS 479 (479)
T ss_pred          cCccccchcCCCCccccCccccCCCCCHHHHHHHHHHHHHHHHHHHHHHHHHHHHHHHhC

```
