# Supplementary material for: Global population genomics of the forest pathogen Dothistroma septosporum reveal chromosome duplications in high dothistromin‐producing strains
Source: PubMed Central journal article supplement (PMC6637865; doi:10.1111/mpp.12791), 2019-04-01
Supplement: MPP-20-784-s009.pdf [file MPP-20-784-s009.pdf]

**Table S4. Single Nucleotide Polymorphisms in dothistromin genes, grouped by dothistromin gene loci**

| New gene name | Dotse1 Protein ID <sup>a</sup> | Amino acids | Unique missense SNPs <sup>b</sup> | Unique synonymous SNPs <sup>b</sup> | Selection dN/dS mean <sup>c</sup> | % ID <sup>d</sup> Ap | % ID An | Predicted or known function     |
|---------------|--------------------------------|-------------|-----------------------------------|-------------------------------------|-----------------------------------|----------------------|---------|---------------------------------|
| <i>Ver1</i>   | 75411                          | 264         | 1                                 | 28                                  | 0.0199                            | 79.1                 | 79.2    | NAD(P) reductase                |
| <i>DotB</i>   | 75412                          | 415         | 16                                | 38                                  | 0.2035                            | -                    | 24.0    | peroxidase                      |
| <i>DotC</i>   | 75413                          | 581         | 13                                | 59                                  | 0.0779                            | 31.2                 | -       | MFS transporter                 |
| <i>PksA</i>   | 48345                          | 2400        | 37                                | 113                                 | 0.1653                            | 55.1                 | 58.2    | polyketide synthase             |
| <i>CypX</i>   | 139960                         | 512         | 6                                 | 28                                  | 0.0886                            | 58.9                 | 61.6    | P450 monooxygenase              |
| <i>AvfA</i>   | 75546                          | 285         | 9                                 | 18                                  | 0.1651                            | 49.3                 | 44.9    | NAD(P) reductase                |
| <i>EpoA</i>   | 57187                          | 421         | 15                                | 33                                  | 0.1513                            | -                    | -       | Epoxide hydrolase               |
| <i>MoxY</i>   | 75547                          | 627         | 9                                 | 39                                  | 0.1034                            | 55.4                 | 50.6    | flavin-binding monooxygenase    |
| <i>AflR</i>   | 75566                          | 480         | 6                                 | 22                                  | 0.1087                            | 27.5                 | 30.4    | Regulatory protein              |
| <i>AflJ</i>   | 57214                          | 457         | 18                                | 29                                  | 0.2424                            | 37.1                 | 40.8    | Methyltransferase               |
| <i>Est1</i>   | 75609                          | 329         | 9                                 | 37                                  | 0.0899                            | 29.6                 | 27.8    | Esterase (alpha/beta hydrolase) |
| <i>OrdB</i>   | 75648                          | 268         | 5                                 | 14                                  | 0.1012                            | 54.1                 | 45.3    | NAD(P) reductase                |
| <i>AvnA</i>   | 57312                          | 526         | 16                                | 79                                  | 0.0845                            | 57.5                 | 58.3    | P450 monooxygenase              |
| <i>HexB</i>   | 181128                         | 1905        | 35                                | 131                                 | 0.1380                            | 52.2                 | 46.0    | Fatty acid synthase             |
| <i>HexA</i>   | 75653                          | 1693        | 34                                | 93                                  | 0.1845                            | 55.4                 | 45.5    | Fatty acid synthase             |
| <i>HypC</i>   | 66978                          | 186         | 12                                | 15                                  | 0.2864                            | 35.2                 | 47.9    | Anthrone oxidase                |
| <i>VbsA</i>   | 75656                          | 648         | 5                                 | 48                                  | 0.0548                            | 72.3                 | 73.1    | VerB synthase (cyclase)         |
| <i>Nor1</i>   | 75691                          | 269         | 7                                 | 28                                  | 0.0662                            | 59.7                 | 58.5    | NAD(P) reductase                |
| <i>AdhA</i>   | 48495                          | 307         | 5                                 | 41                                  | 0.0239                            | 58.1                 | 60.6    | Alcohol dehydrogenase           |
| <i>VerB</i>   | 75692                          | 521         | 5                                 | 57                                  | 0.1765                            | 67.1                 | 67.6    | Desaturase (P450 monooxygenase) |

Row shading indicates groupings of genes (top to bottom) in loci 1-6 (Chettri et al 2013, Fungal Genetics and Biology, 51, 12-20).

<sup>a</sup>Protein identification (accession; PID) numbers refer to those at (<http://genome.jgi.doe.gov/Dotse1/Dotse1.home.html>). The PID numbers shown are the searchable JGI gene models; updated Dotse1 PID numbers for improved gene models are *HexA* 66976, *PksA* 192192, *Ver1* 192193, *HypC* 75655.

<sup>b</sup>Number of unique SNPs (exon sequence only) compared to NZE10.

<sup>c</sup>Mean of all pairwise comparisons between each genome and the NZE genome, calculated using CodeML.

<sup>d</sup>Percentage amino acid identities (% ID) to *A. parasiticus* (Ap) and *A. nidulans* (An) AF/ST genes determined by CLUSTALW whole sequence alignment.
