# Supplementary material for: Global population genomics of the forest pathogen Dothistroma septosporum reveal chromosome duplications in high dothistromin‐producing strains
Source: PubMed Central journal article supplement (PMC6637865; doi:10.1111/mpp.12791), 2019-04-01
Supplement: MPP-20-784-s010.pdf [file MPP-20-784-s010.pdf]

**Table S5. Deleted genes on *Dothistroma septosporum* chromosome 12**

| JGI protein ID | Times Deleted <sup>a</sup> | Start <sup>b</sup> | End     | FM <sup>c</sup> | Early | Middle | Late  | Function prediction <sup>d</sup> |
|----------------|----------------------------|--------------------|---------|-----------------|-------|--------|-------|----------------------------------|
| 57306          | 12                         | 1013331            | 1014396 | 72.82           | 21.46 | 30.29  | 75.92 | protein kinase                   |
| 29200          | 12                         | 1014846            | 1015758 | 1.61            | 0.00  | 4.04   | 17.45 | -                                |
| 75644          | 12                         | 1015931            | 1017521 | 23.11           | 4.32  | 16.52  | 22.93 | -                                |
| 181103         | 12                         | 1017726            | 1018777 | 31.96           | 16.25 | 19.12  | 29.70 | NAD+ binding                     |
| 57307          | 13                         | 1019402            | 1020382 | 2.12            | 0.00  | 0.00   | 31.93 | -                                |
| 39202          | 14                         | 1020670            | 1025486 | 3.65            | 3.28  | 2.25   | 24.54 | protein kinase                   |
| 39203          | 14                         | 1025626            | 1026415 | 0.44            | 0.00  | 2.04   | 23.66 | -                                |
| 39204          | 14                         | 1028725            | 1029975 | 1.29            | 0.00  | 1.10   | 3.04  | nucleic acid binding             |
| 75646          | 14                         | 1030345            | 1033907 | 32.28           | 44.43 | 35.74  | 31.84 | GTP metabolism                   |
| 139618         | 14                         | 1103995            | 1104180 | 0               | 0     | 0      | 0     | -                                |

<sup>a</sup>Number of genomes (out of 18) in which the gene was deleted. These inferences from CNVnator data were confirmed by visualisation of alignments, except visualisation suggested one more deletion of 29200, 75644 and two more deletions of 181103.

<sup>b</sup>Position of the gene (start and end) on *D. septosporum* NZE10 chromosome 12 ([www.genome.jgi.doe.gov/Dotse1](http://www.genome.jgi.doe.gov/Dotse1))

<sup>c</sup>Gene expression (reads per kb per million) in *D. septosporum* NZE10 in culture (FM) or *in planta* (early, mid, late stages of disease) from Bradshaw et al (2016) Molecular Plant Pathology 17, 210-224..

<sup>d</sup>Based on GO terms, where available.
