# Supplementary material for: Global population genomics of the forest pathogen Dothistroma septosporum reveal chromosome duplications in high dothistromin‐producing strains
Source: PubMed Central journal article supplement (PMC6637865; doi:10.1111/mpp.12791), 2019-04-01
Supplement: MPP-20-784-s012.pdf [file MPP-20-784-s012.pdf]

**Table S7a. PCR primers used for verification of 5:13 translocation**

| Primer pair <sup>a</sup> | Start <sup>b</sup> | End <sup>b</sup> | Length bp <sup>c</sup> | Primer sequence 5' to 3'                         | In-house number |
|--------------------------|--------------------|------------------|------------------------|--------------------------------------------------|-----------------|
| 1_3                      | 1459101            | 1459967          | 866                    | 1_AGTCCTGCTGTTTCCGCTAC<br>3_CCCAGTGTGAGAGAGGAGGA | 1715<br>1717    |
| 5_7                      | 717616             | 718513           | 897                    | 5_CATCAAGCAAGAGCAGCTGC<br>7_GAGATGGCGTGAGTCGAGAG | 1719<br>1721    |
| 1_5                      | 1459101            | 718513           | 1289                   | 1_AGTCCTGCTGTTTCCGCTAC<br>5_CATCAAGCAAGAGCAGCTGC | 1715<br>1719    |
| 3_7                      | 1459967            | 718513           | 757                    | 3_CCCAGTGTGAGAGAGGAGGA<br>7_GAGATGGCGTGAGTCGAGAG | 1717<br>1721    |

<sup>a</sup>See Figure 2 for schematic of primer positions

<sup>b</sup>Start and end indicate positions of the primers (amplicon ends) on chromosome 12 of *D. septosporum* NZE10 (<http://genome.jgi.doe.gov/Dotse1/Dotse1.home.html>)

<sup>c</sup>Length of the PCR amplicon

**Table S7b: Primers used for copy number variant verification (qPCR)**

| Primer      | Target gene     | In-house lab No | 5' to 3' sequence        |
|-------------|-----------------|-----------------|--------------------------|
| MR-18_16S F | 16S rRNA        | 1963            | AAATCATCATGCCCCCTTATG    |
| MR-19_16S R |                 | 1964            | CGATTACTAGCAATTCCGACT    |
| Ds72297 F   | Ds72297         | 1965            | GCACACTCACCAACAAGATG     |
| Ds72297 R   |                 | 1966            | CACGAGCCCATAGAGATAACC    |
| Ds72201 F   | Ds72201         | 1967            | TCAAATCACCACCAGAATAGC    |
| Ds72201 R   |                 | 1968            | TAG ATGAGCCGATGACTACTT   |
| Ds72172 F   | Ds72172         | 1969            | CATTTCGGCATCGCAGGTAAG    |
| Ds72172 R   |                 | 1970            | CTCACGCCATCTATTGGTTCTTG  |
| Ds72010 F   | Ds72010         | 1971            | GATGCCGTCCTCCAATCTATGA   |
| Ds72010 R   |                 | 1972            | ATAGTCAGTGCCTCGCCAAA     |
| Ds75320 F   | Ds75320         | 1973            | ATCGTTGGTGATGACTTGACT    |
| Ds75320 R   |                 | 1974            | GGATAGCCTCGGAGATGGTA     |
| Ds75922 F   | Ds75922         | 1975            | CCGACACATACTGATACTAC     |
| Ds75922 R   |                 | 1976            | GAAGCAGATAAGGATGACAT     |
| Ds161036 F  | Ds161036        | 1977            | CTTCAAGGCTGTTCCCATCC     |
| Ds161036 R  |                 | 1978            | CCACTCATCGGTTCTCTTATTCCG |
| Ds75737 F   | Ds75737         | 1979            | TACAAGACTACCTTCGCCATC    |
| Ds75737 R   |                 | 1980            | ACA GAGCAATGTCTCGACTTA   |
| Ds75967 F   | Ds75967         | 1981            | ATATCATCTGGACGGAATCAA    |
| Ds75967 R   |                 | 1982            | CTCCCCTTCATACACTCATT     |
| Ds71743 F   | Ds71743         | 1983            | AAGTCTTGGTGGATATACAT     |
| Ds71743 R   |                 | 1984            | CAGGACATTGATATTGTTCA     |
| Ds29553 F   | Ds29553         | 1985            | TAAGCGAGGAGATTGAGGAT     |
| Ds29553 R   |                 | 1986            | TGAGCGAGGATGTAGAAGAT     |
| Ds75914 F   | Ds75914         | 1987            | GAAGGCGTGTTGTCTGTTGA     |
| Ds75914 R   |                 | 1988            | GTACCATGCCACCATCTTGAAT   |
| Ds71757 F   | Ds71757         | 1989            | TGAGCATTAAACAGCAACACT    |
| Ds71757 R   |                 | 1990            | CCGATGAGGATGTCTTGAAG     |
| Ds158381 F  | <i>DsEcp2-1</i> | 1991            | TGGCTGACTCGTCGTATAACC    |
| Ds158381 R  |                 | 1992            | AGATACCGCCAGATGTTGTT     |
| DsDotC F    | <i>DsDotC</i>   | 1993            | CACTCCTTCGTCTTCATCTC     |
| DsDotC R    |                 | 1994            | CTGACACCTGTGGACAAC       |
| DsDotB F    | <i>DsDotB</i>   | 1995            | CAATACTCCGTGGCGAACAA     |
| DsDotB R    |                 | 1996            | AGTGGTTGGCGAAGAGGTA      |
